# Supplementary material for: Genotypic characteristics of Uropathogenic Escherichia coli isolated from complicated urinary tract infection (cUTI) and asymptomatic bacteriuria—a relational analysis
Source: PeerJ. 2023 Jun 20;11:e15305. doi: 10.7717/peerj.15305 (PMC10289082; doi:10.7717/peerj.15305)
Supplement: Supplemental Information 1 [file peerj-11-15305-s001.xlsx]

## Sheet: Sheet1
Strain Number	Phylogroup	fimH	sfa	papC	iroN	fyuA	chuA	cnf	hly	sat	ompT	kpsMTII	usp	MDR Potential	Clinical manifestation
1	B2	1	0	0	0	1	1	1	0	1	0	1	1	MDR	CUTI with comorbidities
2	B1	1	0	1	0	0	0	0	0	0	0	0	1	MDR	catheter associated UTI
3	B2	1	1	1	0	1	1	0	0	0	0	1	1	MDR	catheter associated UTI
4	B1	1	0	0	0	0	0	0	0	0	1	0	0	NON MDR	CUTI with comorbidities
5	A	1	0	1	0	0	0	0	0	0	0	0	1	MDR	cystitis
6	A	1	0	1	1	0	0	0	1	0	0	0	0	NON MDR	catheter associated UTI
7	B1	1	1	0	0	0	0	1	0	0	1	0	1	NON MDR	cystitis
8	C	1	0	0	0	0	0	0	0	0	0	0	1	NON MDR	catheter associated UTI
9	CLADE 1	1	0	0	0	0	1	0	0	0	0	0	0	NON MDR	CUTI with comorbidities
10	B2	1	0	1	0	1	1	1	0	0	0	1	1	MDR	catheter associated UTI
11	A	1	0	0	0	0	0	0	0	0	0	0	0	NON MDR	CUTI with comorbidities
12	B2	1	1	1	1	0	1	1	1	0	0	0	1	MDR	Pyelonephritis
13	B2	1	1	0	0	0	1	1	0	0	0	1	1	NON MDR	cystitis
14	B2	1	1	0	1	0	1	1	1	0	0	0	1	MDR	Urosepsis
15	C	1	0	0	1	1	0	0	1	0	0	1	1	NON MDR	catheter associated UTI
16	B2	1	0	0	0	0	1	0	0	0	0	0	0	NON MDR	CUTI with comorbidities
17	E	1	0	0	0	1	1	0	0	0	0	1	1	NON MDR	CUTI with comorbidities
18	B1	1	1	0	0	0	0	0	0	0	0	0	1	NON MDR	CUTI with comorbidities
19	B1	1	0	0	0	0	0	0	0	0	0	0	1	NON MDR	CUTI with comorbidities
20	B2	0	0	0	0	0	1	0	0	0	0	1	1	NON MDR	catheter associated UTI
21	B2	1	0	0	0	0	1	0	0	0	0	0	1	NON MDR	CUTI with comorbidities
22	B1	1	0	0	0	0	0	0	1	0	0	0	1	NON MDR	CUTI with comorbidities
23	B2	1	0	1	0	1	1	0	0	0	1	1	1	MDR	Pyelonephritis
24	B2	1	0	1	0	0	1	0	0	0	0	0	1	NON MDR	catheter associated UTI
25	D	1	0	0	0	1	1	0	0	0	0	1	1	NON MDR	CUTI with comorbidities
26	B2	1	1	0	0	1	1	1	1	0	0	1	1	NON MDR	CUTI with comorbidities
27	B2	1	0	1	0	1	1	1	0	0	0	0	1	NON MDR	catheter associated UTI
28	A	1	0	0	0	0	0	0	0	0	0	0	0	MDR	CUTI with comorbidities
29	A	1	0	0	0	0	0	0	0	0	0	0	1	NON MDR	catheter associated UTI
30	B2	1	0	0	0	1	1	0	0	0	0	1	1	MDR	cystitis
31	B2	1	0	1	1	1	1	1	1	0	0	1	1	NON MDR	Urosepsis
32	E	1	0	0	0	0	1	0	0	0	0	0	1	NON MDR	catheter associated UTI
33	B2	1	1	1	1	1	1	1	1	0	0	1	1	MDR	Pyelonephritis
34	A	1	0	0	0	1	0	0	0	1	0	1	0	NON MDR	catheter associated UTI
35	B2	1	0	0	0	1	1	0	0	0	0	1	1	NON MDR	cystitis
36	E	1	0	0	0	0	1	0	0	0	0	0	1	NON MDR	Recurrent UTI
37	E	1	1	1	1	1	1	1	1	0	1	1	1	NON MDR	Urosepsis
38	A	1	1	1	1	1	0	1	1	0	0	1	1	MDR	CUTI with comorbidities
39	B2	1	0	0	0	1	1	0	0	0	0	1	1	MDR	cystitis
40	A	0	0	0	0	1	0	0	0	0	0	0	0	NON MDR	catheter associated UTI
41	D	1	0	0	1	0	1	0	1	0	0	0	1	NON MDR	catheter associated UTI
42	B2	1	0	0	0	0	1	0	0	0	0	0	1	NON MDR	catheter associated UTI
43	B2	1	1	0	1	1	1	1	1	0	0	1	1	NON MDR	catheter associated UTI
44	B2	1	1	0	1	1	1	1	0	0	1	1	1	MDR	catheter associated UTI
45	D	1	0	0	0	1	1	0	0	0	0	1	1	NON MDR	CUTI with comorbidities
46	D	1	0	0	0	0	1	0	0	0	0	1	1	NON MDR	catheter associated UTI
47	D	1	0	1	0	1	1	1	0	0	0	0	1	NON MDR	cystitis
48	B2	1	1	1	1	1	1	1	1	0	0	1	1	NON MDR	catheter associated UTI
49	D	0	0	0	0	0	1	0	0	0	0	0	0	NON MDR	CUTI with comorbidities
50	B2	1	1	1	1	1	1	1	1	0	0	1	1	MDR	Pyelonephritis
51	NT	1	1	1	1	1	1	1	1	0	1	1	1	MDR	catheter associated UTI
52	D	1	0	1	0	0	1	0	0	0	0	1	0	NON MDR	catheter associated UTI
53	NT	1	0	0	1	1	1	1	1	0	0	0	0	NON MDR	CUTI with comorbidities
54	B2	1	1	0	1	1	1	1	1	0	1	1	1	NON MDR	CUTI with comorbidities
55	D	1	0	1	0	0	1	1	0	0	0	1	0	MDR	Urosepsis
56	A	1	0	0	0	0	0	0	0	0	0	1	0	MDR	CUTI with comorbidities
57	B2	1	1	0	0	1	1	1	0	0	1	1	1	MDR	catheter associated UTI
58	C	1	0	0	0	0	0	1	0	0	0	0	0	MDR	CUTI with comorbidities
59	B2	1	1	0	1	1	1	0	1	0	1	1	1	MDR	cystitis
60	A	0	1	0	1	1	0	0	1	0	1	1	1	MDR	CUTI with comorbidities
61	A	1	0	0	0	0	0	0	0	0	1	0	0	MDR	CUTI with comorbidities
62	B2	1	0	1	1	1	1	1	1	0	0	1	1	MDR	Recurrent UTI
63	B2	1	0	0	0	1	1	0	0	0	1	1	1	MDR	cystitis
64	B2	1	0	1	1	1	1	0	1	0	1	1	1	MDR	CUTI with comorbidities
65	B2	1	0	1	1	1	1	1	1	0	1	1	1	MDR	Pyelonephritis
66	D	1	0	0	0	1	1	0	0	1	1	1	0	MDR	CUTI with comorbidities
67	B2	1	0	1	0	1	1	0	0	1	1	0	1	NON MDR	Urosepsis
68	B2	1	0	1	0	0	1	1	0	0	1	1	1	MDR	Pyelonephritis
69	B1	1	0	1	0	0	0	0	0	0	0	0	0	MDR	Recurrent UTI
70	F	1	0	0	0	0	1	0	0	0	1	1	0	MDR	catheter associated UTI
71	B2	1	0	1	1	1	1	1	1	0	1	1	1	MDR	Urosepsis
72	E	0	0	0	0	0	1	0	0	1	1	1	0	MDR	cystitis
73	B2	1	0	0	0	1	1	0	0	1	1	1	1	MDR	CUTI with comorbidities
74	B2	1	0	0	0	1	1	0	0	1	1	1	1	MDR	CUTI with comorbidities
75	B2	1	1	0	1	1	1	1	1	1	1	0	1	MDR	CUTI with comorbidities
76	B2	1	0	1	0	0	1	0	0	0	0	1	1	MDR	catheter associated UTI
77	D	1	0	0	1	1	1	0	1	0	0	1	0	MDR	Recurrent UTI
78	A	0	0	0	1	0	0	0	1	0	0	0	0	NON MDR	CUTI with comorbidities
79	A	1	0	0	1	0	0	0	1	0	1	0	0	MDR	CUTI with comorbidities
80	B2	1	1	1	1	1	1	1	1	1	1	1	1	MDR	Recurrent UTI
81	A	1	1	0	0	0	0	0	0	0	0	0	0	NON MDR	CUTI with comorbidities
82	A	1	0	0	1	0	0	0	1	0	0	0	0	MDR	catheter associated UTI
83	A	1	0	1	0	0	0	0	0	0	1	0	0	NON MDR	Recurrent UTI
84	A	1	0	1	1	0	0	0	1	0	0	0	0	MDR	catheter associated UTI
85	B1	1	0	1	1	1	0	0	1	0	0	0	0	MDR	catheter associated UTI
86	D	1	0	1	0	1	1	0	0	0	0	1	0	NON MDR	catheter associated UTI
87	D	1	0	1	0	1	1	0	0	1	1	1	0	MDR	Recurrent UTI
88	B1	1	0	0	0	0	0	0	0	0	0	0	0	MDR	catheter associated UTI
89	NT	1	0	0	0	0	1	0	0	1	0	1	0	MDR	catheter associated UTI
90	B2	1	0	0	0	1	1	0	0	1	1	1	1	MDR	catheter associated UTI
91	B2	1	0	1	0	1	1	1	1	1	1	1	1	NON MDR	catheter associated UTI
92	B2	1	1	1	1	0	1	1	1	0	1	1	1	NON MDR	catheter associated UTI
93	B2	1	1	1	1	0	1	1	1	0	0	0	1	MDR	Pyelonephritis
94	B1	1	0	0	0	0	0	1	1	0	0	0	0	MDR	Urosepsis
95	F	0	0	1	1	0	1	0	1	0	1	0	0	MDR	CUTI with comorbidities
96	C	1	0	0	1	1	0	1	1	0	1	0	0	MDR	catheter associated UTI
97	B1	1	0	1	0	0	0	0	1	0	1	0	0	NON MDR	CUTI with comorbidities
98	E	1	0	0	0	0	1	0	0	0	1	0	0	NON MDR	Recurrent UTI
99	B2	1	1	1	1	1	1	1	1	0	1	1	1	NON MDR	CUTI with comorbidities
100	NT	1	0	0	0	0	1	0	1	0	0	0	0	MDR	Recurrent UTI
101	B2	1	0	1	0	0	1	0	1	0	0	0	1	MDR	cystitis
102	B2	1	0	1	0	0	1	0	1	0	0	0	1	MDR	cystitis
103	B2	1	0	1	1	1	1	0	1	0	1	0	0	NON MDR	CUTI with comorbidities
104	B1	1	1	0	0	0	0	0	0	0	0	0	0	MDR	CUTI with comorbidities
105	B2	1	1	1	1	1	1	0	1	1	1	0	1	NON MDR	CUTI with comorbidities
106	B1	1	0	1	0	0	0	0	1	0	0	0	1	MDR	cystitis
107	D	1	0	0	1	1	1	0	1	0	0	0	0	MDR	CUTI with comorbidities
108	B2	1	1	1	1	0	1	1	1	0	0	1	1	NON MDR	CUTI with comorbidities
109	C	1	0	0	1	0	0	0	1	0	1	0	0	MDR	CUTI with comorbidities
110	B2	0	0	1	1	0	1	0	1	0	0	1	1	MDR	CUTI with comorbidities
111	D	0	0	0	0	0	1	0	0	0	0	1	2	NON MDR	CUTI with comorbidities
112	E	1	0	0	0	0	1	0	0	0	0	1	3	NON MDR	CUTI with comorbidities
113	D	0	0	0	0	0	1	0	0	0	0	1	0	NON MDR	Recurrent UTI
114	B1	0	0	0	0	0	0	0	0	0	0	0	0	NON MDR	catheter associated UTI
115	B2	0	0	1	1	0	1	0	1	0	0	1	1	MDR	Urosepsis
116	D	1	0	0	0	1	1	0	0	1	0	1	0	MDR	CUTI with comorbidities
117	A	0	0	0	0	0	0	0	0	0	0	0	1	NON MDR	catheter associated UTI
118	B1	1	0	0	1	1	0	0	1	0	0	0	0	NON MDR	CUTI with comorbidities
119	B2	1	1	1	1	1	1	1	1	0	1	1	1	NON MDR	Recurrent UTI
120	B2	1	0	1	1	0	1	0	1	0	0	1	1	NON MDR	Pyelonephritis
121	B2	1	0	1	1	1	1	0	1	0	1	1	1	NON MDR	Recurrent UTI
122	B2	0	0	0	0	0	1	0	0	0	0	0	1	NON MDR	catheter associated UTI
123	B2	1	0	0	0	1	1	0	0	0	0	1	0	NON MDR	CUTI with comorbidities
124	A	1	0	0	0	0	0	0	0	0	0	0	0	MDR	Pyelonephritis
125	B2	1	0	1	0	0	1	1	0	0	0	1	1	MDR	cystitis
126	B2	1	0	1	0	1	1	1	0	0	0	1	1	MDR	Pyelonephritis
127	F	1	1	0	1	0	1	0	1	0	1	0	0	MDR	CUTI with comorbidities
128	E	1	0	1	0	0	1	0	0	1	0	0	1	MDR	CUTI with comorbidities
129	B2	1	0	0	0	1	1	0	0	1	0	1	1	MDR	CUTI with comorbidities
130	D	1	0	0	1	0	1	0	1	0	0	0	0	MDR	cystitis
131	B2	1	0	1	1	1	1	0	1	0	0	0	0	MDR	cystitis
132	B2	1	1	1	1	1	1	1	1	0	1	1	1	MDR	catheter associated UTI
133	B2	1	1	0	0	0	1	0	0	0	0	1	1	NON MDR	catheter associated UTI
134	B2	1	1	0	0	0	1	0	0	0	0	1	0	NON MDR	CUTI with comorbidities
135	B1	1	0	0	0	0	0	0	0	0	0	0	0	MDR	catheter associated UTI
136	A	0	0	0	0	0	0	0	0	0	1	0	0	MDR	Recurrent UTI
137	B2	1	1	1	1	1	1	1	1	0	0	0	0	MDR	CUTI with comorbidities
138	A	0	0	0	0	0	0	0	0	0	1	0	1	NON MDR	Recurrent UTI
139	B2	0	1	0	0	0	1	0	0	0	1	0	1	MDR	cystitis
140	C	1	0	0	0	0	0	0	0	1	0	0	0	NON MDR	cystitis
141	B2	1	1	0	0	1	1	1	0	0	0	1	0	NON MDR	CUTI with comorbidities
